# Supplementary material
Source: Springer Nature journal article supplement (https://www.springermedizin.de/resource/supplementary/12885_2008_1499_MOESM2_ESM.pdf/9472172)

(a) Visual 1

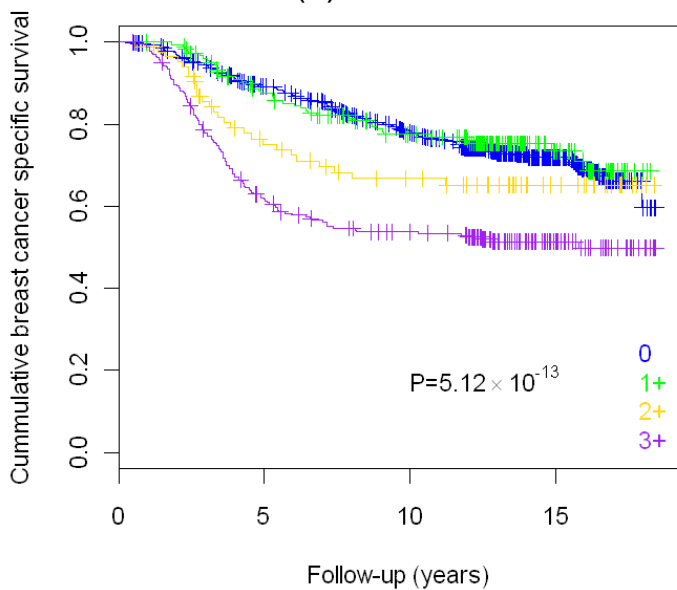

(b) Visual 2

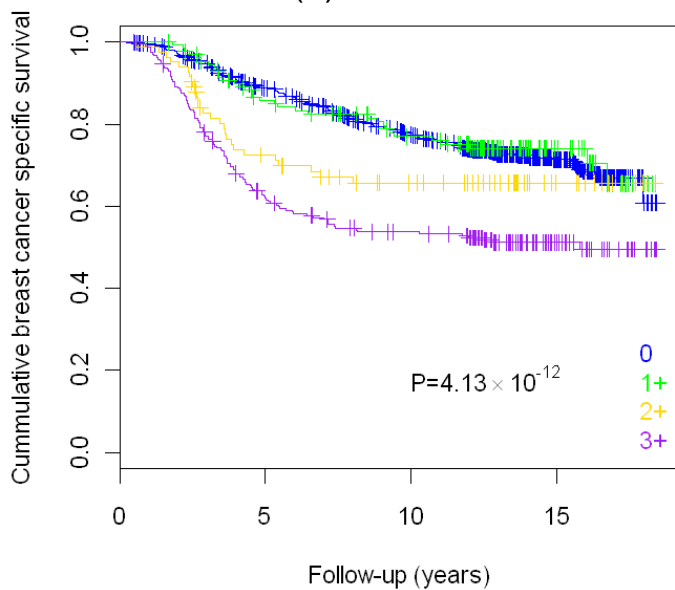

(c) Machine 1

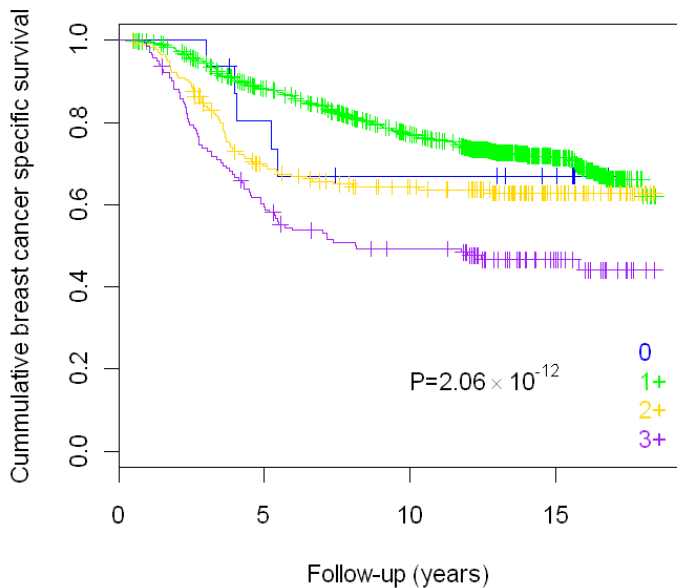

(d) Machine 2

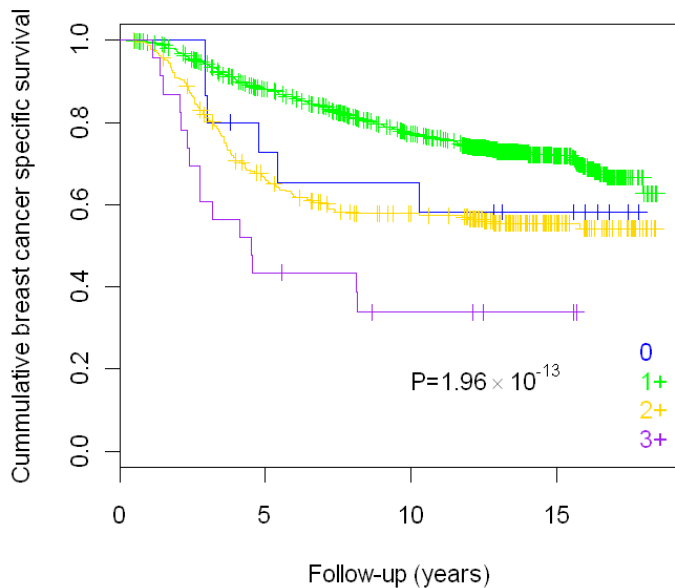

Supplement: MOESM2 [file 9472172]
